# Supplementary material for: Uniquely structured composite microspheres of metal sulfides and carbon with cubic nanorooms for highly efficient anode materials for sodium-ion batteries
Source: Royal Society of Chemistry journal article supplement (doi:10.1039/c8ta11481a), 2019-01-01
Supplement: c8ta11481a1.pdf [file c8ta11481a1.pdf]

## SUPPLEMENTARY INFORMATION

### **Uniquely Structured Composite Microspheres of Metal Sulfides and Carbon with Cubic Nanorooms for Highly Efficient Anode Materials for Sodium-Ion Batteries**

Jin Koo Kim,<sup>†a</sup> Seung-Keun Park,<sup>†b</sup> Jin-Sung Park,<sup>a</sup> and Yun Chan Kang<sup>\*a</sup>

<sup>a</sup> *Department of Materials Science and Engineering, Korea University, Anam-dong,  
Seongbuk-gu, Seoul 136-713, Republic of Korea. E-mail: [yckang@korea.ac.kr](mailto:yckang@korea.ac.kr)*

<sup>b</sup> *Department of Chemical Engineering, Kongju National University, 1223-24 Cheonandaero,  
Seobuk-gu, Cheonan 31080, Republic of Korea*

<sup>†</sup> *These authors contributed equally to this work.*

## Characterization

Structural and morphological analyses of the synthesized powders were performed using scanning electron microscopy (SEM; TESCAN, VEGA3) and field-emission transmission electron microscopy (TEM; JEOL, JEM-2100F). The crystal structures and phases were analyzed using X-ray diffraction (XRD; X'Pert PRO) with Cu-K $\alpha$  radiation. The specific surface areas and pore-size distributions of the samples were estimated via Brunauer–Emmett–Teller (BET; TriStar 3000) analysis of nitrogen-adsorption measurements. The chemical states of the MoS<sub>2</sub>/C-NR composite microspheres were confirmed using X-ray photoelectron spectroscopy (XPS; Thermo Scientific K-Alpha) with Al-K $\alpha$  radiation (12 kV and 20 mA). The carbon content of the MoS<sub>2</sub>/C-NR composite was determined via thermogravimetric analysis (SDT Q600), courtesy of Korea Basic Science Institute in Busan. Raman spectroscopy (LabRam HR800, Horiba Jobin-Yvon, excited by 515-nm diode laser) was conducted at room temperature to study the nature of the carbon and MoS<sub>2</sub> nanosheets of the MoS<sub>2</sub>/C-NR composite.

## Electrochemical Measurements

The sodium-ion storage performances of the synthesized samples were analyzed by assembling 2032-type coin cells. The anode material slurry was prepared via mechanical mixing of the sample powders (active material, 70 wt%), Super P<sup>®</sup> (conducting agent, 20 wt%), and sodium carboxymethyl cellulose (binder, 10 wt%) with a few drops of distilled water. To prepare the working electrode, the slurry was printed on a copper foil using a doctor blade and dried under ambient air. The mass loading of the mixture on the electrode was 1.4 mg cm<sup>-2</sup> (diameter of the round electrode was 14 mm). Sodium foil was employed as the counter electrode. Microporous polypropylene film was employed as the separator. The electrolyte was prepared by dissolving 1 M of NaClO<sub>4</sub> in a 1:1 volume mixture of ethylene carbonate and

dimethyl carbonate (DMC) with 5 wt% fluoroethylene carbonate. Galvanostatic charge/discharge and cyclic voltammetry (CV) measurements were conducted using an electrochemical cyler (WonA tech) in the potential range of 0.001–3.0 V vs. Na<sup>+</sup>/Na. Electrochemical impedance spectroscopy (EIS) was performed using a potentiostat/galvanostat (ZIVE SP1, WonA Tech) in the frequency range of 0.01 Hz–100 kHz. After the cycling performance tests, the cells were disassembled in an argon-filled glove box, and the working electrodes were removed and washed with DMC and dried in vacuum for the following characterizations.

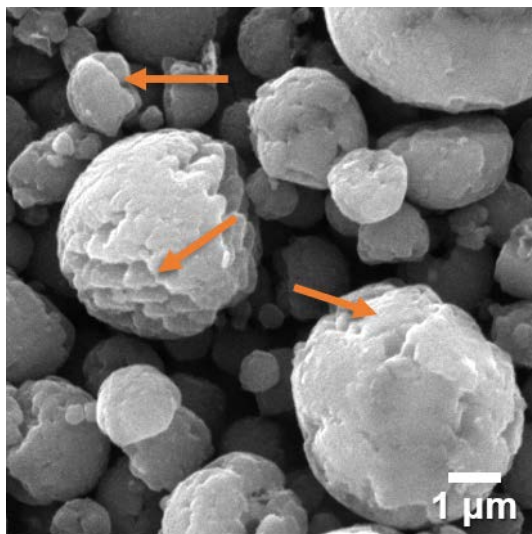

**Fig. S1** SEM image of MoO<sub>3</sub>/C-NaCl composite microspheres prepared via one-pot spray pyrolysis.

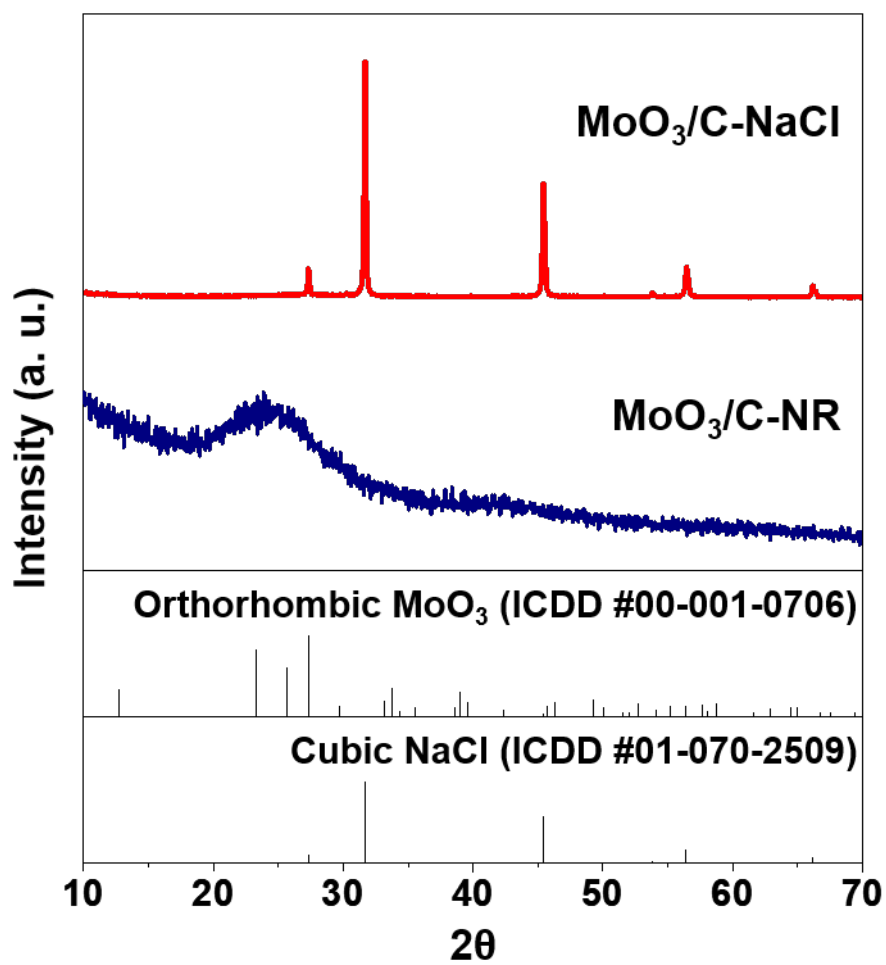

**Fig. S2** XRD patterns of  $\text{MoO}_3/\text{C-NaCl}$  (before washing) and  $\text{MoO}_3/\text{C-NR}$  (after washing).

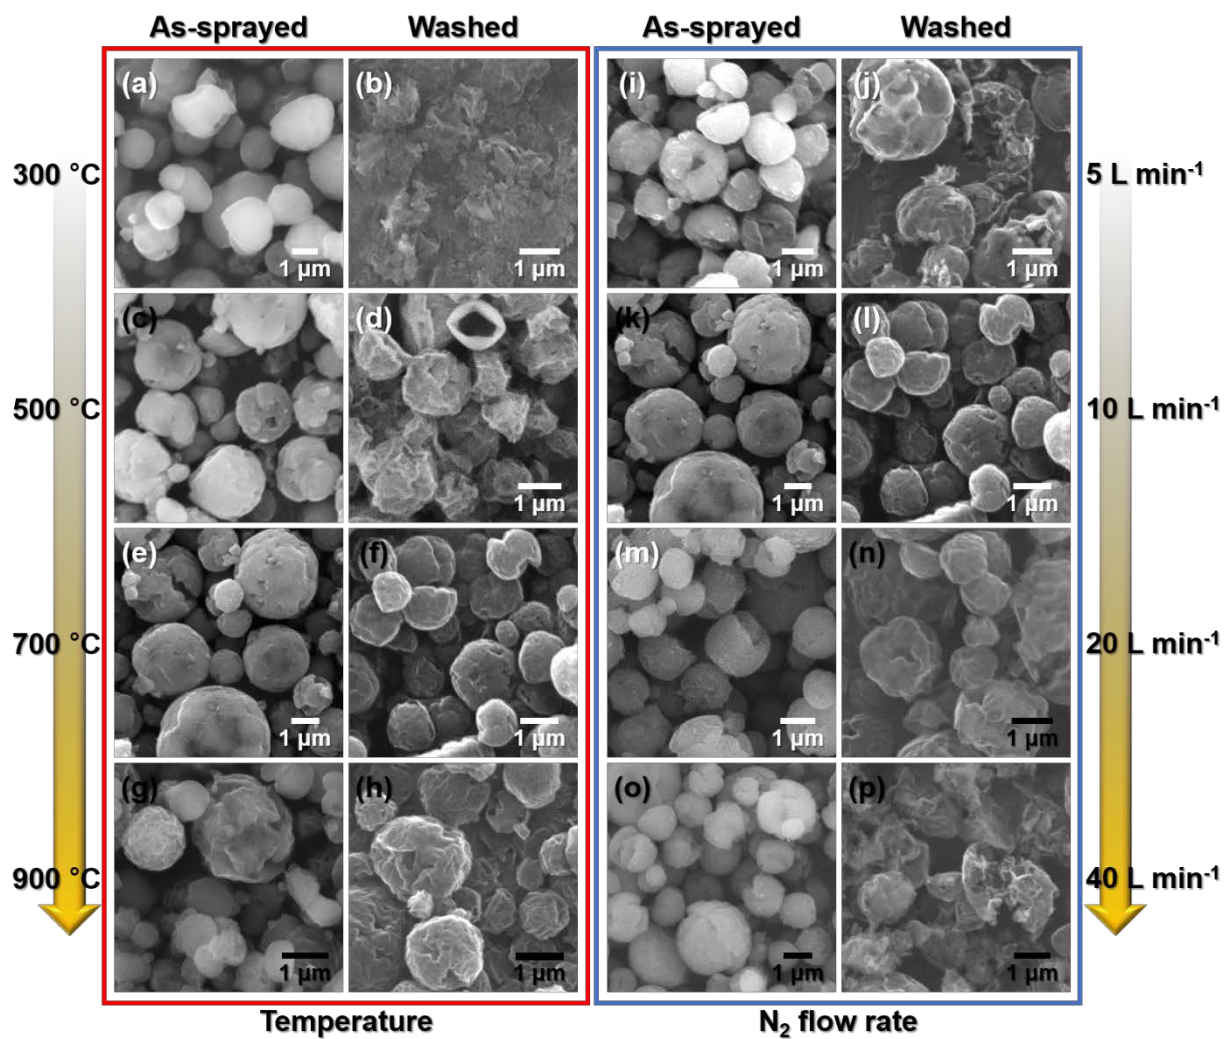

**Fig. S3** Morphological change of MoO<sub>3</sub>/C-NR upon the variation of (a-h) synthesis temperature and (i-p) N<sub>2</sub> flow rate.

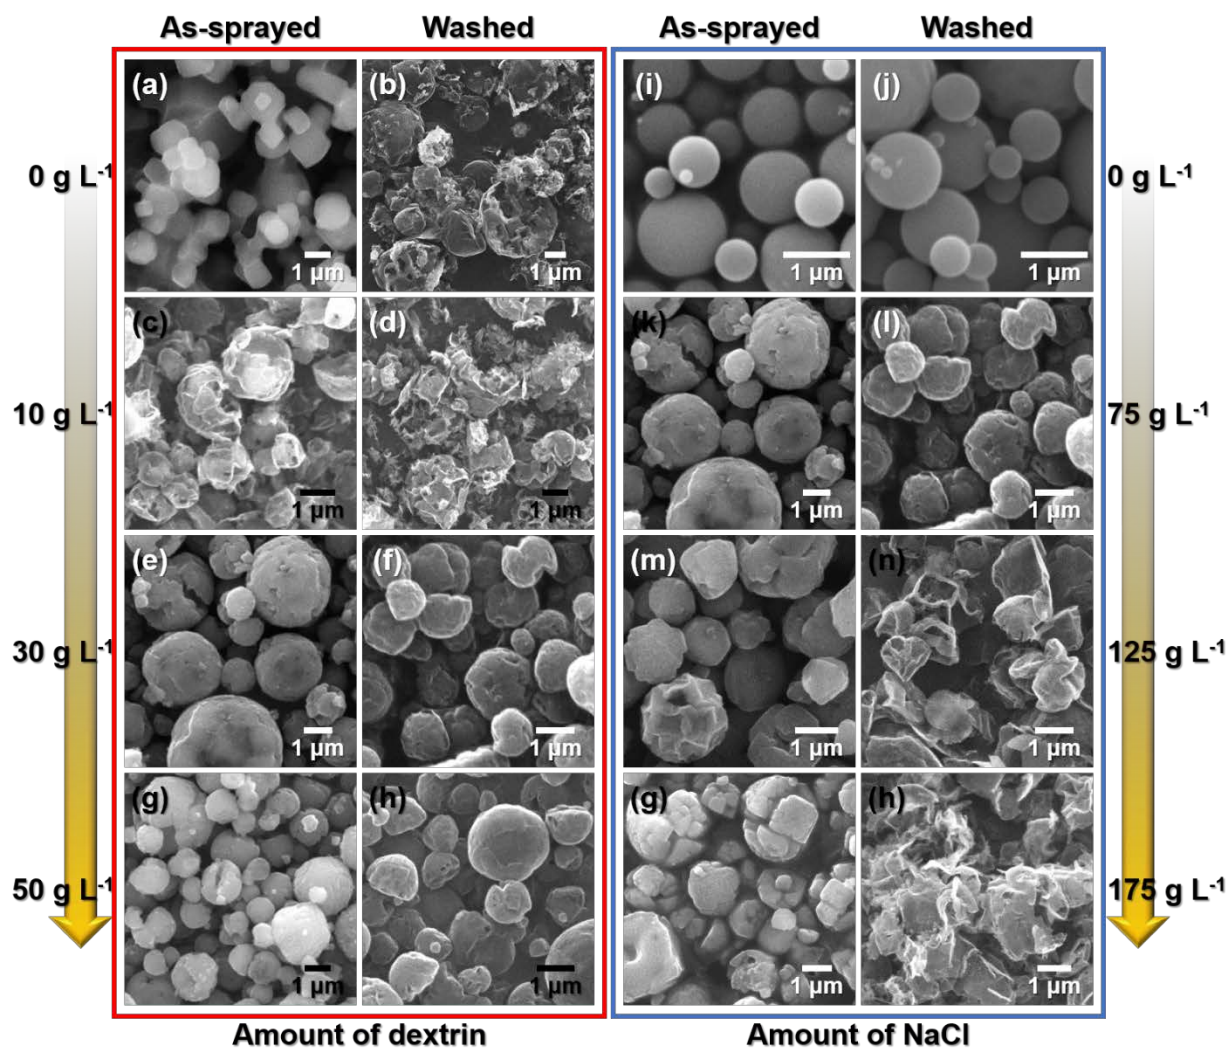

**Fig. S4** Morphological change of  $\text{MoO}_3/\text{C-NR}$  upon the variation of (a-h) the amount of dextrin and (i-p) the amount of NaCl.

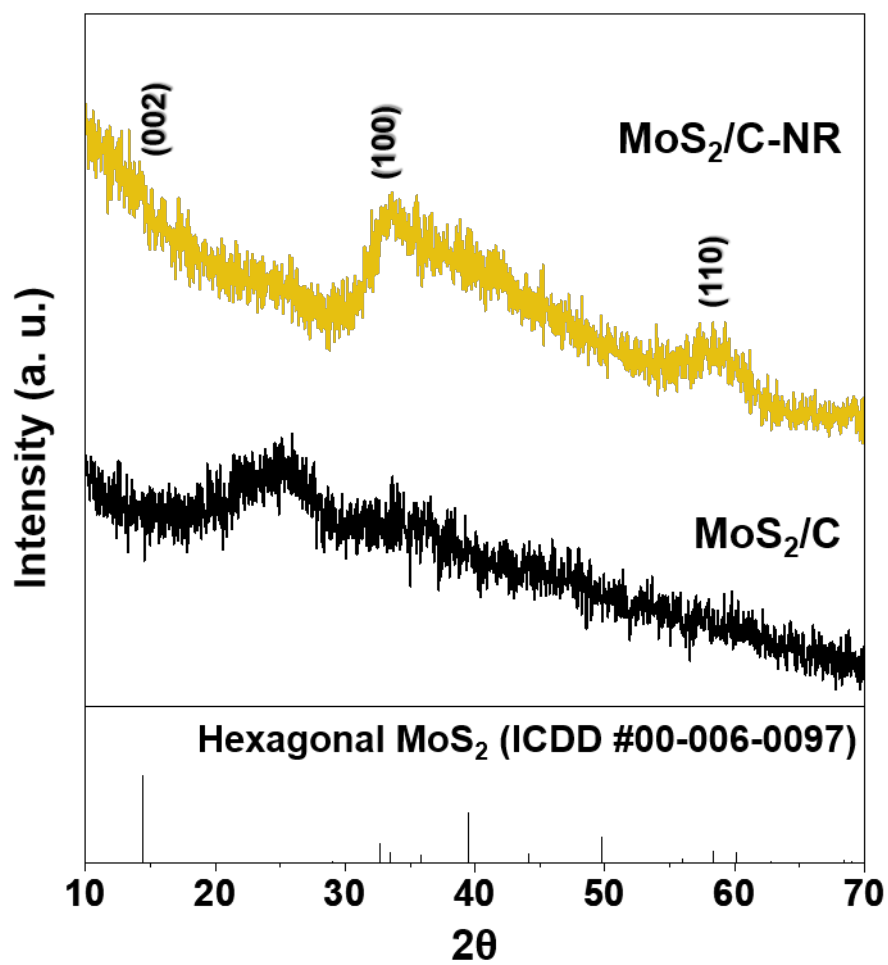

Fig. S5 XRD patterns of MoS<sub>2</sub>/C-NR and MoS<sub>2</sub>/C.



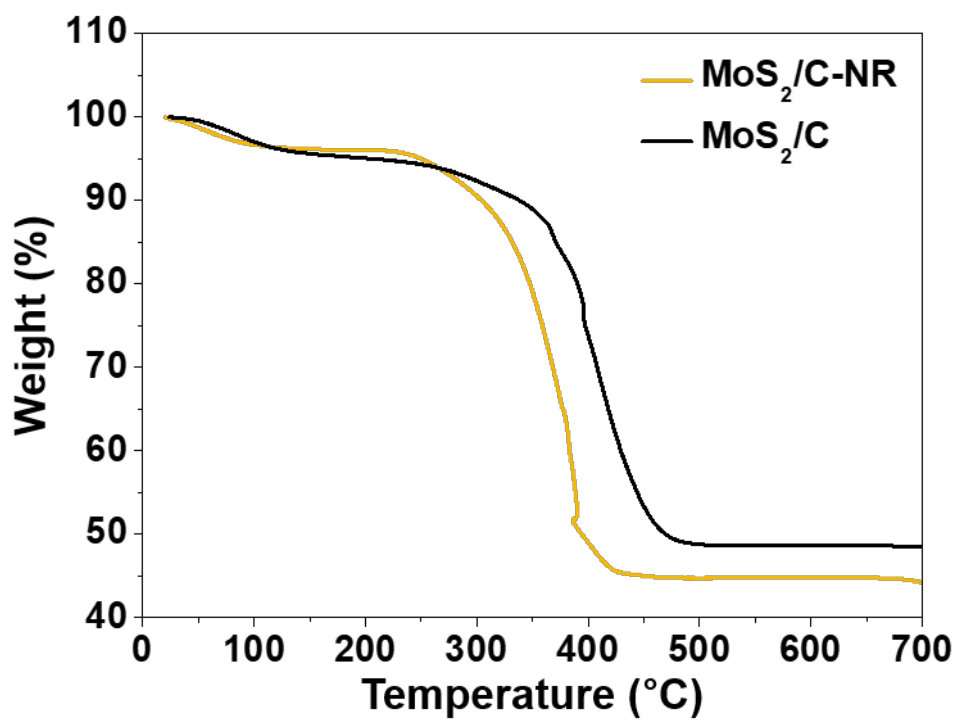

Fig. S6 TG curves of MoS<sub>2</sub>/C-NR and MoS<sub>2</sub>/C.

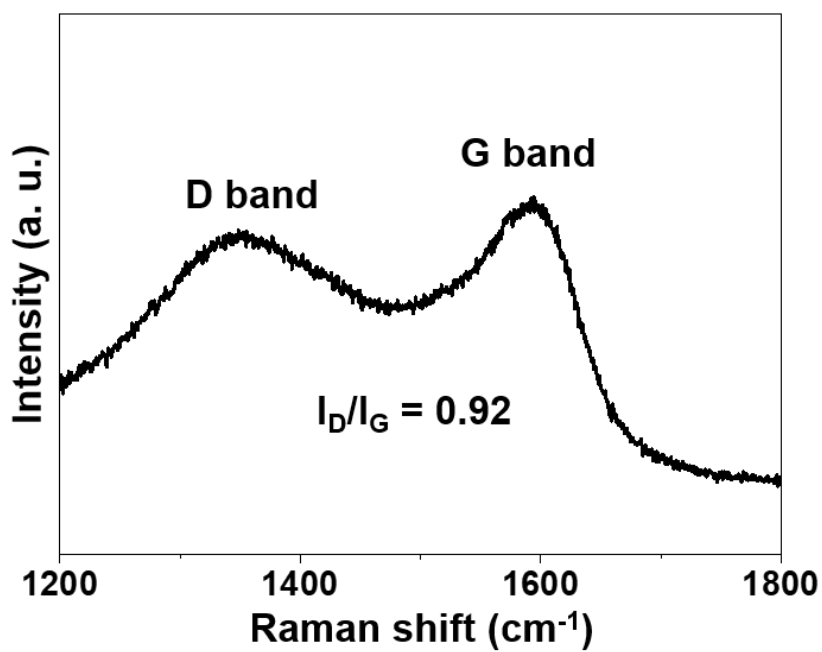

Fig. S7 Raman spectrum of MoS<sub>2</sub>/C.

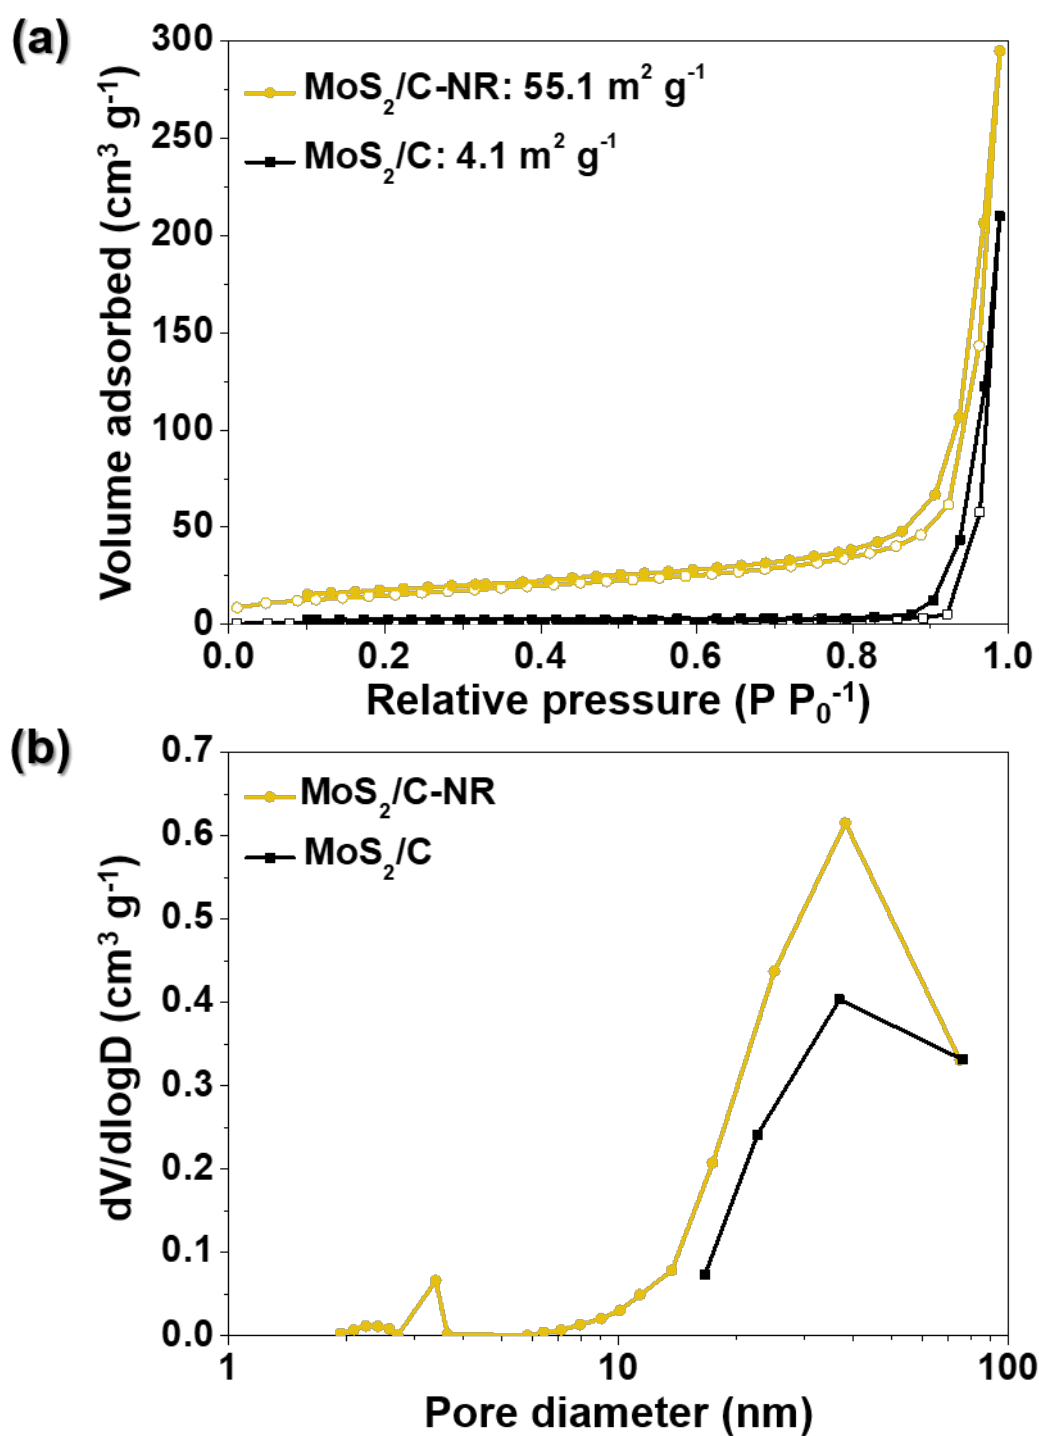

**Fig. S8** (a) N<sub>2</sub> gas adsorption/desorption isotherms and (b) BJH pore size distributions of MoS<sub>2</sub>/C-NR and MoS<sub>2</sub>/C.

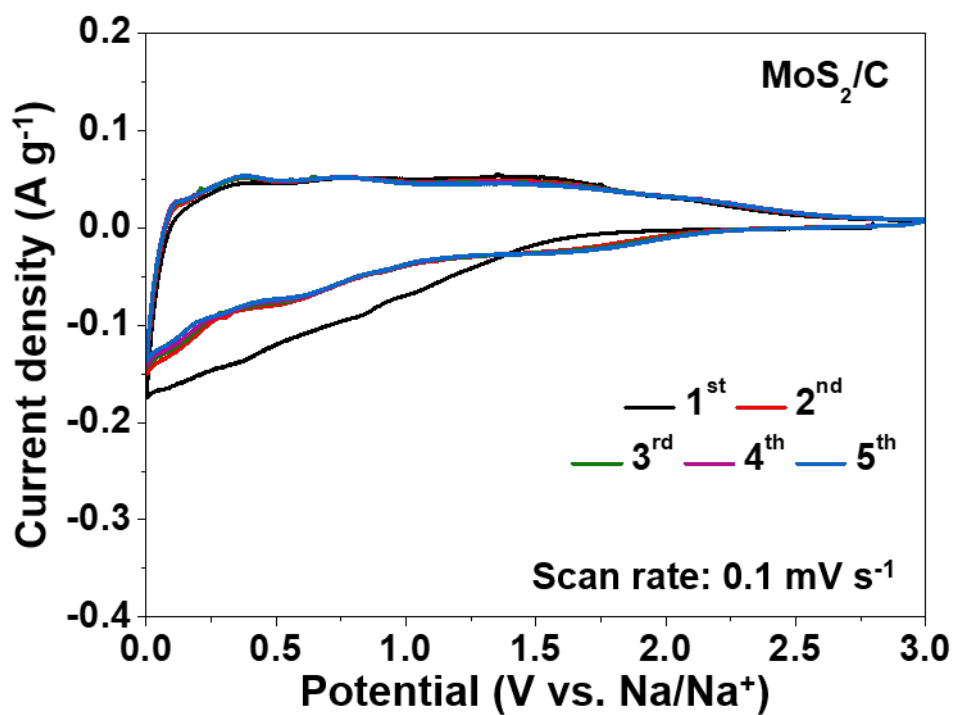

**Fig. S9** CV curves of MoS<sub>2</sub>/C for the initial 5 cycles.

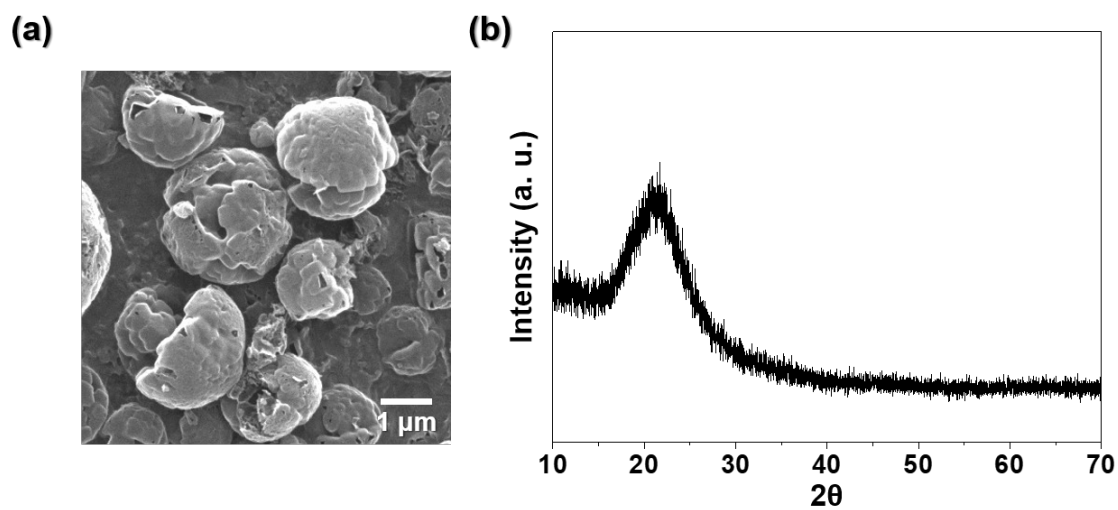

**Fig. S10** (a) SEM image and (b) XRD pattern of C-NR.

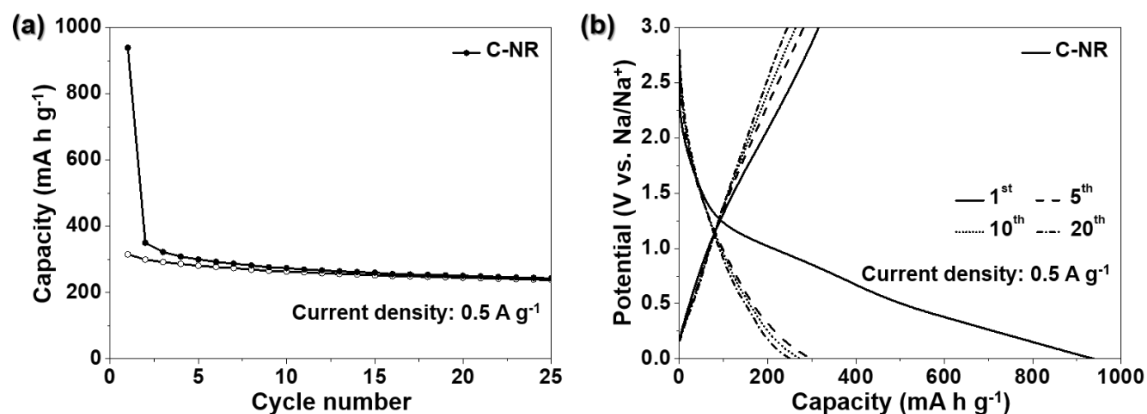

**Fig. S11** Sodium-ion storage performance of C-NR: (a) cycling performance at a current density of  $0.5 \text{ A g}^{-1}$  and (b) discharge-charge profiles.

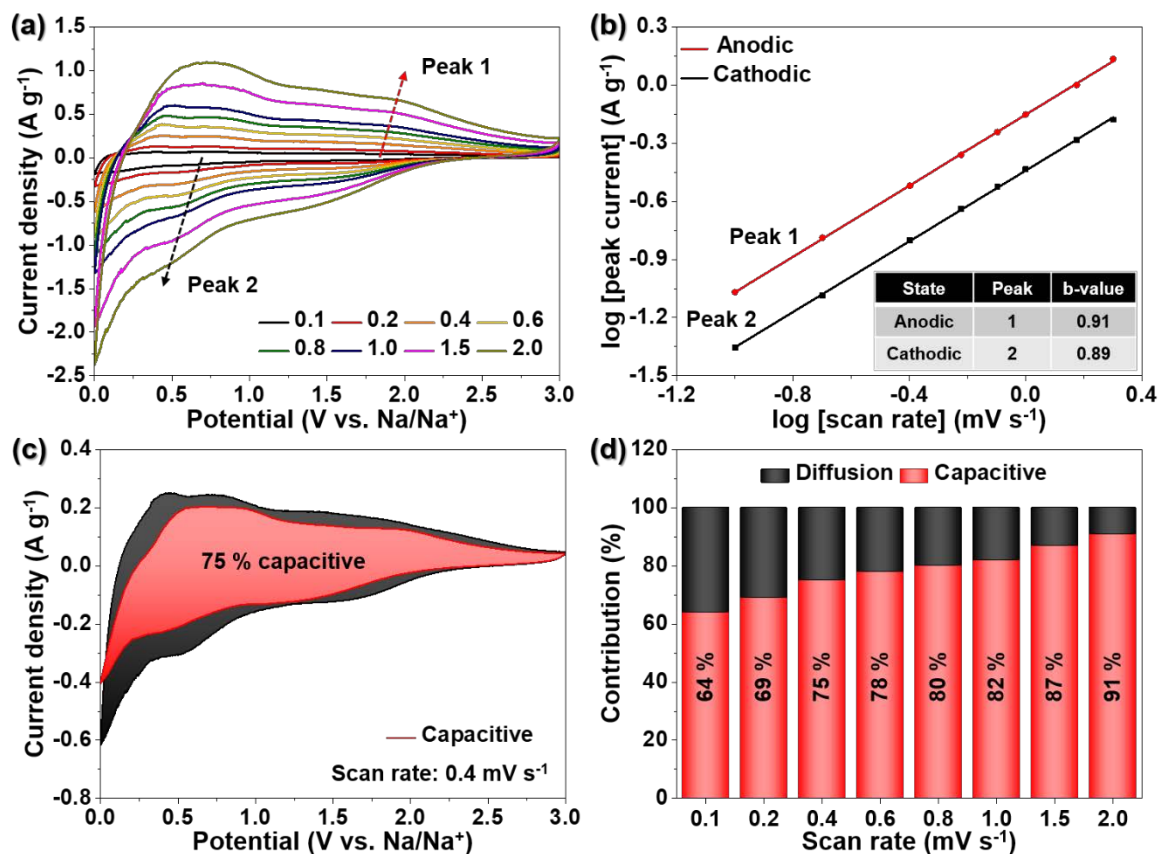

**Fig. S12** Electrochemical kinetics analysis of  $\text{MoS}_2/\text{C}$ : (a) CV curves at various scan rates from  $0.1$  to  $2.0 \text{ mV s}^{-1}$ , (b) corresponding  $\log(i)$  vs.  $\log(v)$  plots at designated peak currents, (c) CV curve with the capacitive fraction (shaded area) at a scan rate of  $0.4 \text{ mV s}^{-1}$ , and (d) bar chart summarizing the capacitive contributions at various scan rates.

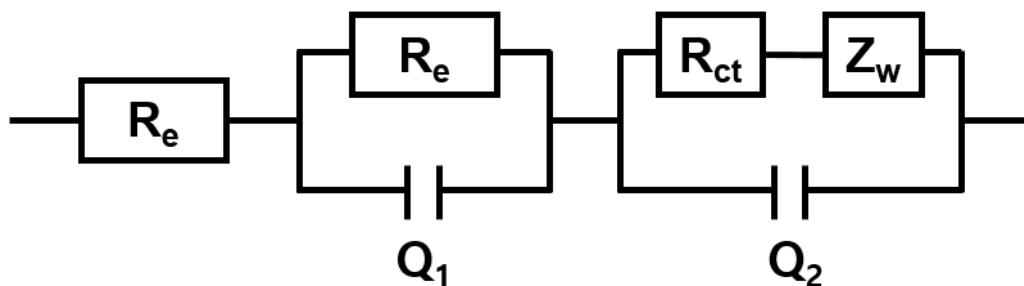

**Fig. S13** Equivalent circuit model used for EIS.

$R_e$ : Electrolyte resistance, corresponding to the intercept of high frequency semicircle at  $Z_{re}$  axis

$R_f$ : SEI layer resistance corresponding to the high-frequency semicircle

$Q_1$ : Dielectric relaxation capacitance corresponding to the high-frequency semicircle

$R_{ct}$ : Charge transfer resistance related to the middle-frequency semicircle

$Q_2$ : Associated double-layer capacitance related to the middle-frequency semicircle

$Z_w$ : Na-ion diffusion resistance

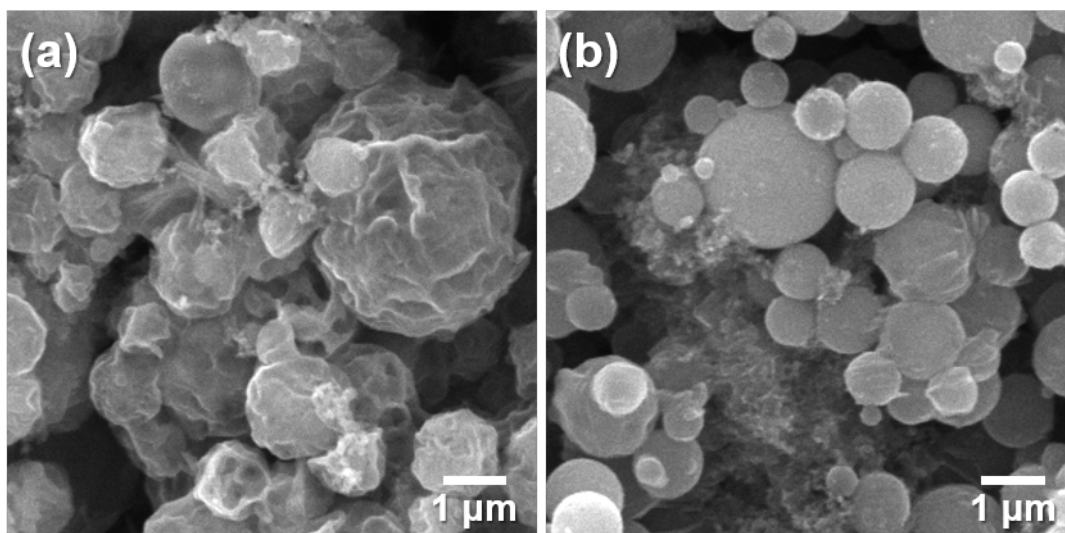

**Fig. S14** SEM images of the electrodes obtained after 100 cycles: (a)  $\text{MoS}_2/\text{C-NR}$  and (b)

$\text{MoS}_2/\text{C}$ .

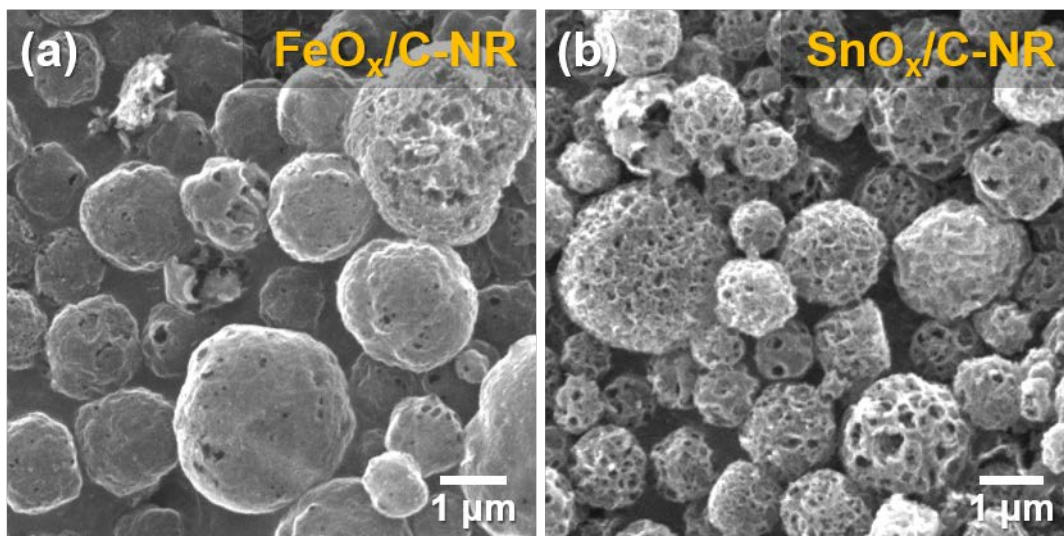

**Fig. S15** SEM images of the MeO<sub>x</sub>/C-NR powders: (a) FeO<sub>x</sub>/C-NR and (b) SnO<sub>x</sub>/C-NR.

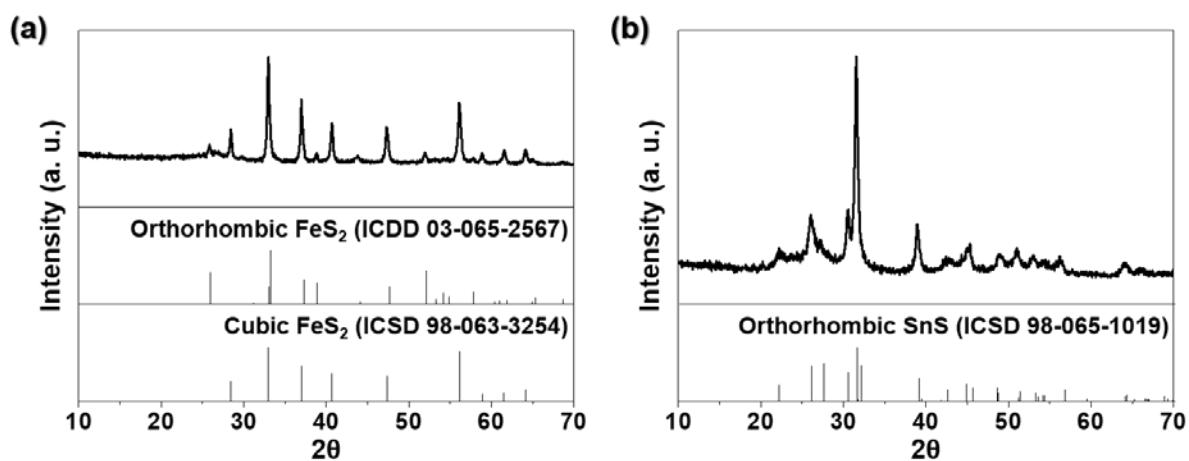

**Fig. S16** XRD patterns of (a) FeS<sub>2</sub>/C-NR and (b) SnS/C-NR.

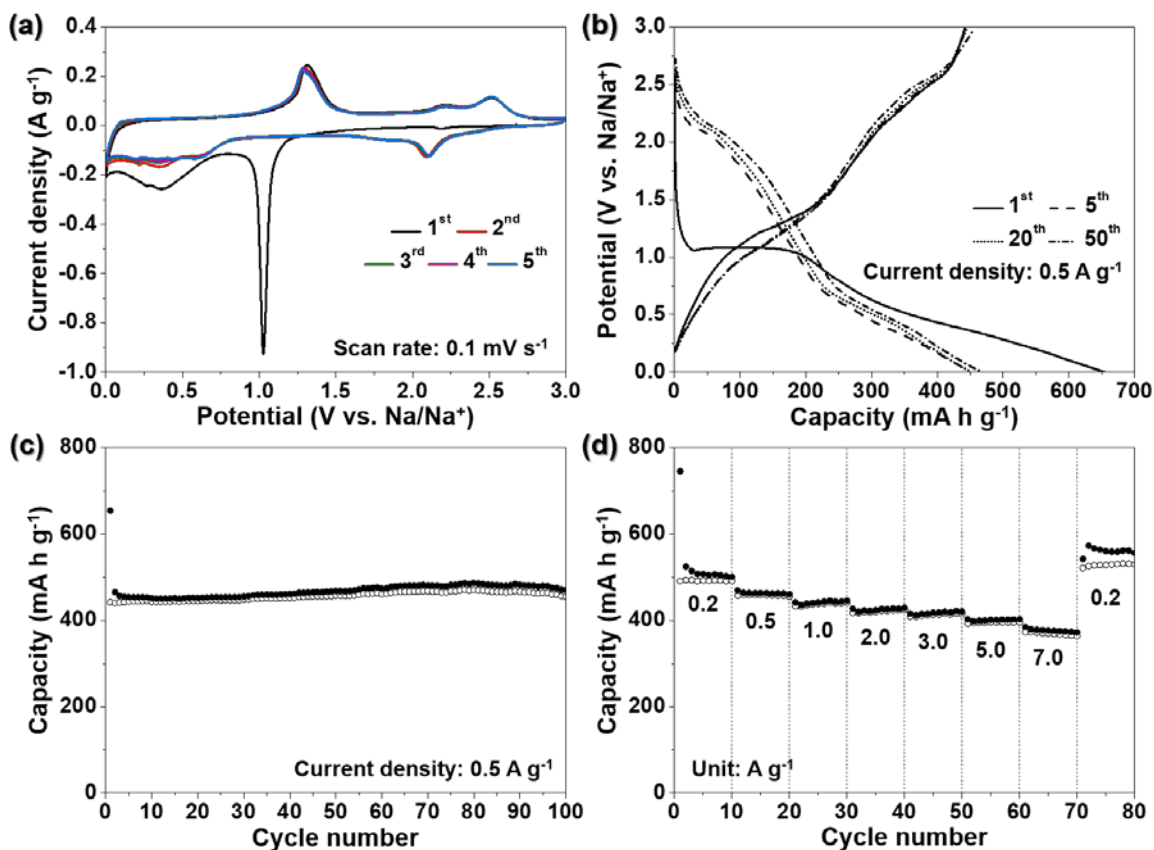

**Fig. S17** Sodium-ion storage performances of FeS<sub>2</sub>/C-NR: (a) CV curves for the initial 5 cycles, (b) discharge-charge profiles, (c) cycling performance at a current density of 0.5 A g<sup>-1</sup>, and (d) rate performance.

In the first cathodic scan of the CV graph of FeS<sub>2</sub>/C-NR (Figure S12a), the reduction peaks at 1.02 corresponded to the Na<sup>+</sup> ion intercalation to FeS<sub>2</sub> to form Na<sub>x</sub>FeS<sub>2</sub> ( $x < 2$ ). The subsequent reduction peak at 0.37 and 0.27 V was attributed to the conversion reaction to form Fe nanocrystals and Na<sub>2</sub>S matrix, along with the formation of SEI layer. For the anodic scan, the oxidation peaks at 1.29, 2.18 and 2.52 V corresponded to the desodiation process of Fe and Na<sub>2</sub>S to form Na<sub>2</sub>FeS<sub>2</sub> and further removal of Na to form Na<sub>2-x</sub>FeS<sub>2</sub> ( $0 < x < 2$ ). From the second cycle and onward, the reduction peak at 0.37 V disappeared, indicating that FeS<sub>2</sub> phase could not be recovered after the first cycle because of the irreversible formation of the SEI layer that preceded the conversion reaction.<sup>S1,S2</sup>

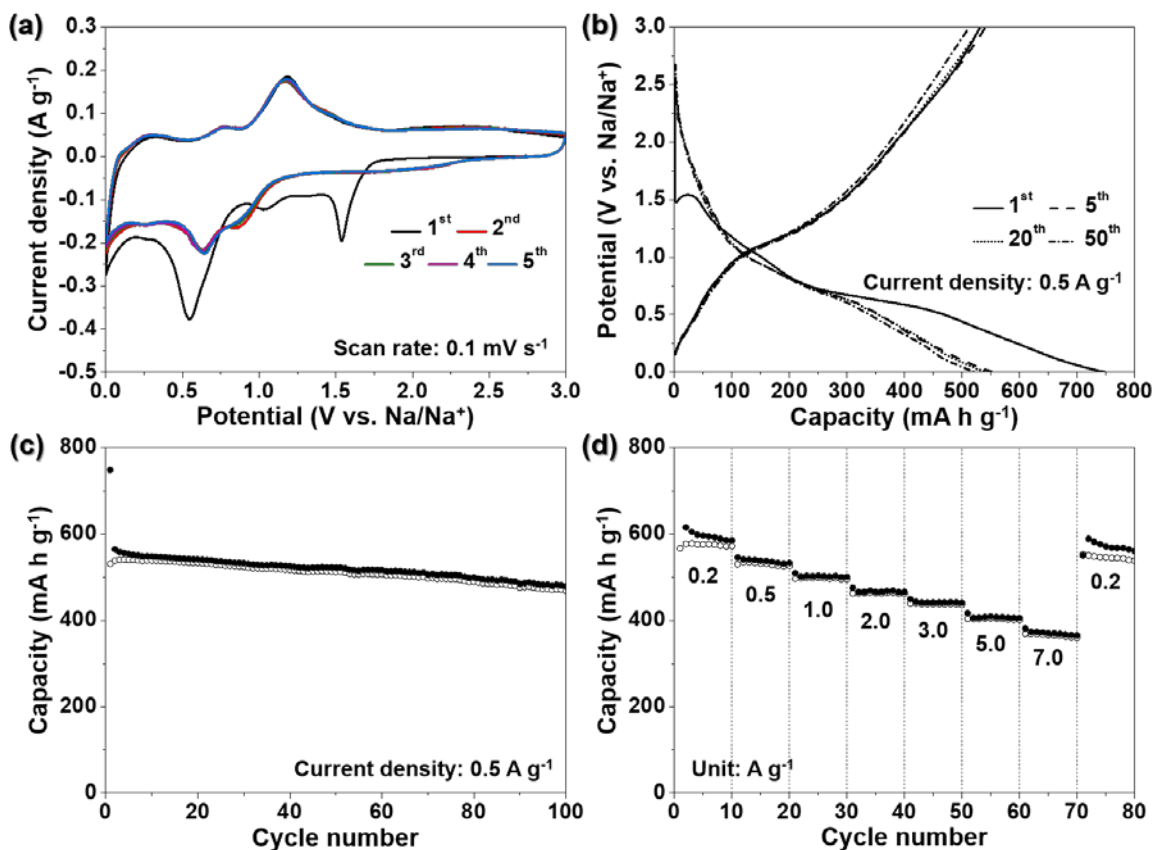

**Fig. S18** Sodium-ion storage performances of SnS/C-NR: (a) CV curves for the initial 5 cycles, (b) discharge-charge profiles, (c) cycling performance at a current density of  $0.5 \text{ A g}^{-1}$ , and (d) rate performance.

In the first cathodic scan of the CV graph of SnS/C-NR (Figure S13a), the reduction peaks at 1.54 and 1.03 V was attributed to the conversion of SnS into Sn nanocrystals and  $\text{Na}_2\text{S}$  matrix, along with the formation of SEI layer. The sharp reduction peak at 0.54 V was attributed to the alloying reactions of Na and Sn to form  $\text{Na}_x\text{Sn}$  alloys. In the following anodic scan, the oxidation peaks at 0.29 and 0.74 V corresponded to the dealloying process of  $\text{Na}_x\text{Sn}$  to Sn metal. The other oxidation peaks at 1.18 and 1.40 V were assigned to the reversible conversion reaction.<sup>S3,S4</sup>



**Table S1** Electrochemical properties of various nanostructured MoS<sub>2</sub>-based anode materials for sodium-ion batteries reported in the previous literatures.

| Morphology                                   | Synthesis method       | Voltage window [V] | Current density [A g <sup>-1</sup> ] | Discharge capacity [mA h g <sup>-1</sup> ] (Cycle) | Rate performance [mA h g <sup>-1</sup> ] (Current density) | Ref. |
|----------------------------------------------|------------------------|--------------------|--------------------------------------|----------------------------------------------------|------------------------------------------------------------|------|
| Micro-MoS <sub>2</sub>                       | Solid-state reaction   | 0.2-3              | 0.2                                  | 136 (70 <sup>th</sup> )                            | 112 (10 A g <sup>-1</sup> )                                | S5   |
| MoS <sub>2</sub> /C nanofibers               | Electrospinning        | 0.01-3             | 0.1                                  | 284 (600 <sup>th</sup> )                           | 186 (2.0 A g <sup>-1</sup> )                               | S6   |
| MoS <sub>2</sub> nanoflowers                 | Hydrothermal synthesis | 0.4-3              | 1.0                                  | 300 (1500 <sup>th</sup> )                          | 175 (10 A g <sup>-1</sup> )                                | S7   |
| Worm-like MoS <sub>2</sub>                   | Solvothermal synthesis | 0.01-3             | 0.062                                | 411 (80 <sup>th</sup> )                            | ~50 (0.62 A g <sup>-1</sup> )                              | S8   |
| Ultrathin MoS <sub>2</sub>                   | Ultrasonic exfoliation | 0.01-3             | 0.04                                 | 386 (100 <sup>th</sup> )                           | 251 (0.32 A g <sup>-1</sup> )                              | S9   |
| Vine-like MoS <sub>2</sub> nanofiber         | Electrospinning        | 0.01-3             | 0.1                                  | 600 (600 <sup>th</sup> )                           | 660 (2.5 A g <sup>-1</sup> )                               | S10  |
| 3D MoS <sub>2</sub> -graphene microspheres   | Spray pyrolysis        | 0.001-3            | 1.5                                  | 322 (600 <sup>th</sup> )                           | 234 (10 A g <sup>-1</sup> )                                | S11  |
| 3D MoS <sub>2</sub> -rGO nanoflowers         | Hydrothermal synthesis | 0.01-2.6           | 0.5                                  | 318 (90 <sup>th</sup> )                            | 433 (1.0 A g <sup>-1</sup> )                               | S12  |
| MoS <sub>2</sub> /C nanospheres              | Hydrothermal synthesis | 0.005-2.5          | 0.067                                | 400 (300 <sup>th</sup> )                           | 390 (1.34 A g <sup>-1</sup> )                              | S13  |
| MoS <sub>2</sub> /hierarchical porous carbon | Solventless process    | 0.01-2.9           | 1.0                                  | 280 (300 <sup>th</sup> )                           | 122 (10 A g <sup>-1</sup> )                                | S14  |

|                                                      |                             |                |            |                               |                                             |                  |
|------------------------------------------------------|-----------------------------|----------------|------------|-------------------------------|---------------------------------------------|------------------|
| 3D interconnected MoS <sub>2</sub> @carbon nanofiber | Electrospinning             | 0.05-3         | 1.0        | 282 (600 <sup>th</sup> )      | 412<br>(1.0 A g <sup>-1</sup> )             | S15              |
| MoS <sub>2</sub> /C-multiwall CNT                    | Hydrothermal synthesis      | 0.005-3        | 2.0        | 416 (1000 <sup>th</sup> )     | 324<br>(20 A g <sup>-1</sup> )              | S16              |
| MoS <sub>2</sub> nanosheets on amorphous CNT         | Hydrothermal synthesis      | 0.005-3        | 0.5        | 461 (150 <sup>th</sup> )      | 396<br>(1.6 A g <sup>-1</sup> )             | S17              |
| 3D MoS <sub>2</sub> @C framework                     | Melamine foam carbonization | 0.05-3         | 1.0        | 240 (500 <sup>th</sup> )      | 95<br>(10 A g <sup>-1</sup> )               | S18              |
| <i>MoS<sub>2</sub>/C with cubic nanorooms</i>        | <i>Spray pyrolysis</i>      | <i>0.001-3</i> | <i>0.5</i> | <i>385 (350<sup>th</sup>)</i> | <i>287</i><br><i>(7.0 A g<sup>-1</sup>)</i> | <i>This work</i> |

## REFERENCES

- (S1) Z. Liu, T. Lu, T. Song, X.-Y. Yu, X. W. D. Lou and U. Paik, *Energy Environ. Sci.*, 2017, **10**, 1576-1580.
- (S2) A. Douglas, R. Carter, L. Oakes, K. Share, A. P. Cohn and C. L. Pint, *ACS Nano*, 2015, **9**, 11156-11165.
- (S3) S. H. Choi and Y. C. Kang, *Nano Res.*, 2015, **8**, 1595-1603.
- (S4) X. Xiong, C. Yang, G. Wang, Y. Lin, X. Ou, J.-H. Wang, B. Zhao, M. Liu, Z. Lin and K. Huang, *Energy Environ. Sci.*, 2017, **10**, 1757-1763.
- (S5) X. Wang, Y. Li, Z. Guan, Z. Wang and L. Chen, *Chem. Eur. J.*, 2015, **21**, 6465-6468.
- (S6) X. Xiong, W. Luo, X. Hu, C. Chen, L. Qie, D. Hou and Y. Huang, *Sci. Rep.*, 2015, **5**, 9254.
- (S7) Z. Hu, L. Wang, K. Zhang, J. Wang, F. Cheng, Z. Tao and J. Chen, *Angew. Chem. Int. Ed.*, 2014, **53**, 12794-12798.

- (S8) M. Xu, F. L. Yi, Y. Niu, J. Xie, J. Hou, S. Liu, W. H. Hu, Y. Li and C. M. Li, *J. Mater. Chem. A*, 2015, **3**, 9932-9937.
- (S9) D. Su, S. Dou and G. Wang, *Adv. Energy Mater.*, 2015, **5**, 1401205.
- (S10) W.-H. Ryu, J.-W. Jung, K. Park, S.-J. Kim and I.-D. Kim, *Nanoscale*, 2014, **6**, 10975-10981.
- (S11) S. H. Choi, Y. N. Ko, J. K. Lee and Y. C. Kang, *Adv. Funct. Mater.*, 2015, **25**, 1780-1788.
- (S12) T. S. Sahu and S. Mitra, *Sci. Rep.*, 2015, **5**, 12571.
- (S13) J. Wang, C. Luo, T. Gao, A. Langrock, A. C. Mignerey and C. Wang, *Small*, 2015, **11**, 473-481.
- (S14) S.-K. Park, J. Lee, S. Bong, B. Jang, K.-D. Seong and Y. Piao, *ACS Appl. Mater. Interfaces*, 2016, **8**, 19456-19465.
- (S15) W. Li, R. Bi, G. Liu, Y. Tian and L. Zhang, *ACS Appl. Mater. Interfaces*, 2018, **10**, 26982-26989.
- (S16) B. Chen, H. Lu, J. Zhou, C. Ye, C. Shi, N. Zhao and S. Z. Qiao, *Adv. Energy Mater.*, 2018, **8**, 1702909.
- (S17) X. Xu, D. Yu, H. Zhou, L. Zhang, C. Xiao, C. Guo, S. Guo and S. Ding, *J. Mater. Chem. A*, 2016, **4**, 4375-4379.
- (S18) Z.-H. Zhao, X.-D. Hu, H. Wang, M.-Y. Ye, Z.-Y. Sang, H.-M. Ji, X.-L. Li and Y. Dai, *Nano Energy*, 2018, **48**, 526-535.
